# Supplementary material for: Cost-utility of direct transfer to angiography suite (DTAS) bypassing conventional imaging for patients with acute ischemic stroke in Spain: results from the ANGIOCAT trial
Source: PubMed Central journal article supplement — J Neurointerv Surg. 2023 Apr 27;16(2):138–42. doi: 10.1136/jnis-2023-020275 (PMC10850729; doi:10.1136/jnis-2023-020275), 2023-04-27
Supplement: jnis-2023-020275supp001.pdf [file jnis-2023-020275supp001.pdf]

## Supplemental Material

### Cost-Utility of Direct Transfer to Angiography Suite (DTAS) bypassing conventional imaging for patients with Acute Ischemic Stroke in Spain: Results from the ANGIOCAT trial

|                               | Item | Guidance for Reporting                                                                                                          | Reported in section                                                                                                                                                                                                                                                                                                                                                                                                                                                           |
|-------------------------------|------|---------------------------------------------------------------------------------------------------------------------------------|-------------------------------------------------------------------------------------------------------------------------------------------------------------------------------------------------------------------------------------------------------------------------------------------------------------------------------------------------------------------------------------------------------------------------------------------------------------------------------|
| <b>TITLE</b>                  |      |                                                                                                                                 |                                                                                                                                                                                                                                                                                                                                                                                                                                                                               |
| Title                         | 1    | Identify the study as an economic evaluation and specify the interventions being compared.                                      | Title                                                                                                                                                                                                                                                                                                                                                                                                                                                                         |
| <b>ABSTRACT</b>               |      |                                                                                                                                 |                                                                                                                                                                                                                                                                                                                                                                                                                                                                               |
| Abstract                      | 2    | Provide a structured summary that highlights context, key methods, results and alternative analyses.                            | Abstract                                                                                                                                                                                                                                                                                                                                                                                                                                                                      |
| <b>INTRODUCTION</b>           |      |                                                                                                                                 |                                                                                                                                                                                                                                                                                                                                                                                                                                                                               |
| Background and objectives     | 3    | Give the context for the study, the study question and its practical relevance for decision making in policy or practice.       | Abstract                                                                                                                                                                                                                                                                                                                                                                                                                                                                      |
| <b>METHODS</b>                |      |                                                                                                                                 |                                                                                                                                                                                                                                                                                                                                                                                                                                                                               |
| Health economic analysis plan | 4    | Indicate whether a health economic analysis plan was developed and where available.                                             | NA                                                                                                                                                                                                                                                                                                                                                                                                                                                                            |
| Study population              | 5    | Describe characteristics of the study population (such as age range, demographics, socioeconomic, or clinical characteristics). | Health outcomes, classified according to the modified Rankin Scale, were obtained from the ANGIOCAT trial (as outlined in Methods). Baseline characteristics of patient population is provided in Table 1 of Requena M, Olivé-Gadea M, Muchada M, et al. Direct to Angiography Suite Without Stopping for Computed Tomography Imaging for Patients With Acute Stroke: A Randomized Clinical Trial. <i>JAMA Neurol.</i> 2021;78(9):1099–1107. doi:10.1001/jamaneurol.2021.2385 |
| Setting and location          | 6    | Provide relevant contextual information that may influence findings.                                                            | Methods - Model design                                                                                                                                                                                                                                                                                                                                                                                                                                                        |
| Comparators                   | 7    | Describe the interventions or strategies being compared and why chosen.                                                         | Methods - Model design                                                                                                                                                                                                                                                                                                                                                                                                                                                        |
| Perspective                   | 8    | State the perspective(s) adopted by the study and why chosen.                                                                   | Methods - Model design<br>Discussion                                                                                                                                                                                                                                                                                                                                                                                                                                          |
| Time horizon                  | 9    | State the time horizon for the study and why appropriate.                                                                       | Methods - Model design<br>Discussion                                                                                                                                                                                                                                                                                                                                                                                                                                          |
| Discount rate                 | 10   | Report the discount rate(s) and reason chosen.                                                                                  | Methods - Unit costs and resource utilization                                                                                                                                                                                                                                                                                                                                                                                                                                 |
| Selection of outcomes         | 11   | Describe what outcomes were used as the measure(s) of benefit(s) and harm(s).                                                   | Methods - Health state utility values and calculation of QALYs                                                                                                                                                                                                                                                                                                                                                                                                                |

|                                                                       |    |                                                                                                                                                                             |                                                                                                      |
|-----------------------------------------------------------------------|----|-----------------------------------------------------------------------------------------------------------------------------------------------------------------------------|------------------------------------------------------------------------------------------------------|
| Measurement of outcomes                                               | 12 | Describe how outcomes used to capture benefit(s) and harm(s) were measured.                                                                                                 | Methods - Health state utility values and calculation of QALYs                                       |
| Valuation of outcomes                                                 | 13 | Describe the population and methods used to measure and value outcomes.                                                                                                     | Methods - Health state utility values and calculation of QALYs                                       |
| Measurement and valuation of resources and costs                      | 14 | Describe how costs were valued.                                                                                                                                             | Methods - Unit costs and resource utilization                                                        |
| Currency, price date, and conversion                                  | 15 | Report the dates of the estimated resource quantities and unit costs, plus the currency and year of conversion.                                                             | Methods – Study design<br>Methods – Unit costs and resource utilization                              |
| Rationale and description of model                                    | 16 | If modelling is used, describe in detail and why used. Report if the model is publicly available and where it can be accessed.                                              | Methods – Model design                                                                               |
| Analytics and assumptions                                             | 17 | Describe any methods for analyzing or statistically transforming data, any extrapolation methods, and approaches for validating any model used.                             | Methods – Unit costs and resource utilization                                                        |
| Characterizing heterogeneity                                          | 18 | Describe any methods used for estimating how the results of the study vary for sub-groups.                                                                                  | NA                                                                                                   |
| Characterizing distributional effects                                 | 19 | Describe how impacts are distributed across different individuals or adjustments made to reflect priority populations.                                                      | NA                                                                                                   |
| Characterizing uncertainty                                            | 20 | Describe methods to characterize any sources of uncertainty in the analysis.                                                                                                | Methods – Sensitivity analysis                                                                       |
| Approach to engagement with patients and others affected by the study | 21 | Describe any approaches to engage patients or service recipients, the general public, communities, or stakeholders (e.g., clinicians or payers) in the design of the study. | Clinicians were involved in the design of the study.<br><br>Methods                                  |
| <b>RESULTS</b>                                                        |    |                                                                                                                                                                             |                                                                                                      |
| Study parameters                                                      | 22 | Report all analytic inputs (e.g., values, ranges, references) including uncertainty or distributional assumptions.                                                          | Table 1                                                                                              |
| Summary of main results                                               | 23 | Report the mean values for the main categories of costs and outcomes of interest and summarise them in the most appropriate overall measure.                                | Table 1                                                                                              |
| Effect of uncertainty                                                 | 24 | Describe how uncertainty about analytic judgments, inputs, or projections affect findings. Report the effect of choice of discount rate and time horizon, if applicable.    | Results – One way sensitivity analysis<br>Results – Probabilistic sensitivity analysis<br>Discussion |

|                                                                      |    |                                                                                                                                                         |                                 |
|----------------------------------------------------------------------|----|---------------------------------------------------------------------------------------------------------------------------------------------------------|---------------------------------|
| Effect of engagement with patients and others affected by the study  | 25 | Report on any difference patient/service recipient, general public, community, or stakeholder involvement made to the approach or findings of the study | NA                              |
| <b>DISCUSSION</b>                                                    |    |                                                                                                                                                         |                                 |
| Study findings, limitations, generalizability, and current knowledge | 26 | Report key findings, limitations, ethical or equity considerations not captured, and how these could impact patients, policy, or practice.              | Discussion                      |
| <b>OTHER RELEVANT INFORMATION</b>                                    |    |                                                                                                                                                         |                                 |
| Source of funding                                                    | 27 | Describe how the study was funded and any role of the funder in the identification, design, conduct, and reporting of the analysis                      | Conflict of interest disclosure |
| Conflicts of interest                                                | 28 | Report authors conflicts of interest according to journal or International Committee of Medical Journal Editors requirements.                           | Conflict of interest disclosure |

**Supplemental Table I Consolidated Health Economic Evaluation Reporting Standards (CHEERS) checklist; NA: not available**

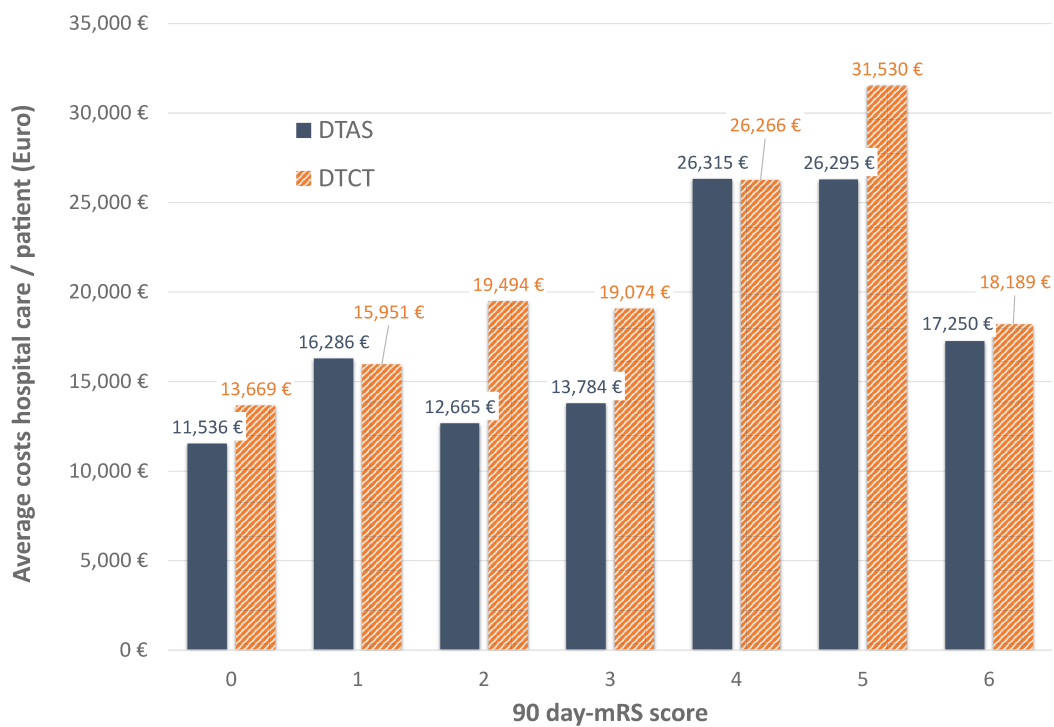

**Supplemental Figure 1 Average costs of hospital care / patient (Euro) versus 90-day mRS for DTAS (solid blue bars) and conventional imaging (DTCT, striped orange bars).**

|                           | Value       | Cost saving |             |
|---------------------------|-------------|-------------|-------------|
| Parameter                 | 18,189.00 € | -2,848 €    | (Base case) |
| mRS 6 (death) cost - DTCT | 2,000.00 €  | 2,697 €     |             |
|                           | 4,000.00 €  | 2,012 €     |             |
|                           | 6,000.00 €  | 1,327 €     |             |
|                           | 8,000.00 €  | 642 €       |             |
|                           | 10,000.00 € | -43 €       |             |
|                           | 12,000.00 € | -728 €      |             |
|                           | 14,000.00 € | -1,413 €    |             |
|                           | 16,000.00 € | -2,098 €    |             |
|                           | 18,000.00 € | -2,783 €    |             |
|                           | 20,000.00 € | -3,468 €    |             |

**Supplemental Table 2 Results of the one-way sensitivity analysis of varying the cost of mRS 6 in different increments**

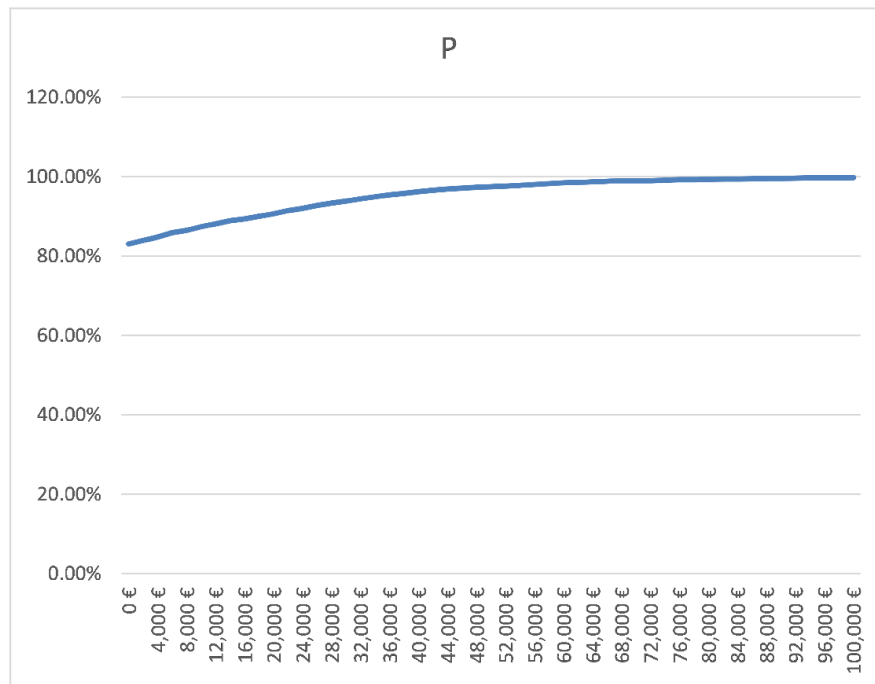

**Supplemental Figure 2 Probability of CBCT DTAS being cost-effective at different thresholds.**
